# Supplementary material
Source: PubMed Central journal article supplement (PMC3553238)

**A)**

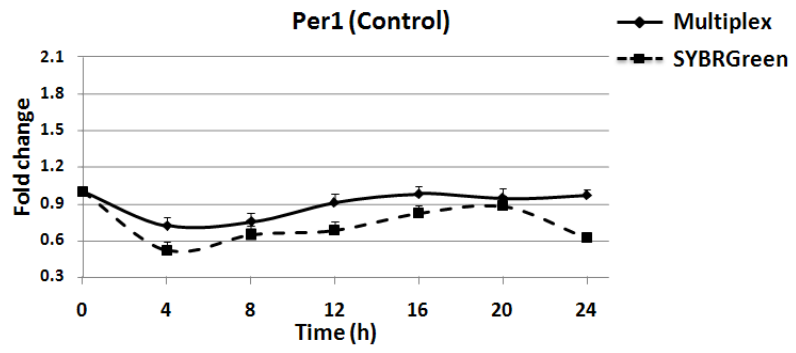

**B)**

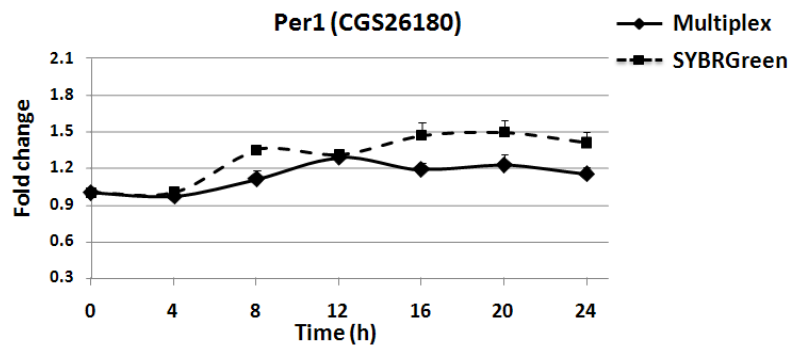

**C)**

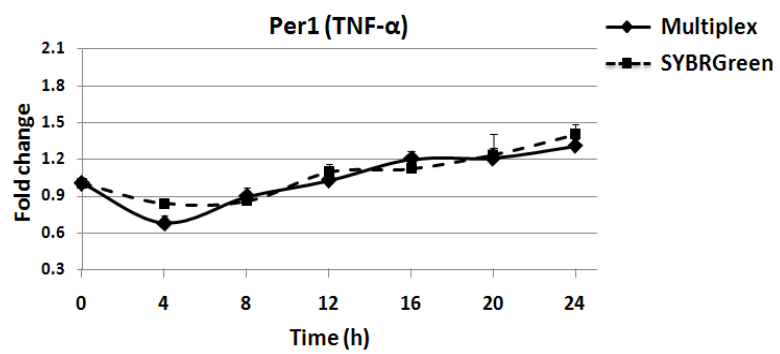

Supplement: NIHMS406137-supplement-10753_2012_9530_MOESM1_ESM.pdf [file NIHMS406137-supplement-10753_2012_9530_MOESM1_ESM.pdf]
